# Supplementary material for: Risk Analysis Index and Its Recalibrated Version Predict Postoperative Outcomes Better Than 5-Factor Modified Frailty Index in Traumatic Spinal Injury
Source: PubMed Central journal article supplement — Neurospine. 2022 Dec 31;19(4):1039–48. doi: 10.14245/ns.2244326.163 (PMC9816576; doi:10.14245/ns.2244326.163), 2022-12-31
Supplement: ns-2244326-163-suppl1.pdf [file ns-2244326-163-suppl1.pdf]

**Supplementary Table 1.** Current Procedural Terminology (CPT) codes used to identify patients undergoing spine surgery from National Surgical Quality Improvement Program database 2015–2019

| Description | CPT                    |
|-------------|------------------------|
| 22010-22855 | Spinal instrumentation |
| 62380-63707 | Spinal procedures      |
