# Supplementary material for: Risk Analysis Index and Its Recalibrated Version Predict Postoperative Outcomes Better Than 5-Factor Modified Frailty Index in Traumatic Spinal Injury
Source: PubMed Central journal article supplement — Neurospine. 2022 Dec 31;19(4):1039–48. doi: 10.14245/ns.2244326.163 (PMC9816576; doi:10.14245/ns.2244326.163), 2022-12-31
Supplement: ns-2244326-163-suppl2.pdf [file ns-2244326-163-suppl2.pdf]

**Supplementary Table 2.** Most abundant International Classification of Diseases (ICD)-9 and ICD-10 codes among the spine trauma cohort, n = 6,571, from National Surgical Quality Improvement Program 2015–2019

| Description                                      | ICD-9 | N = 713/762 | Description                        | ICD-10 | N = 4,427/5,809 |
|--------------------------------------------------|-------|-------------|------------------------------------|--------|-----------------|
| Fracture of vertebrae without spinal cord injury | 805   | 387         | Fracture of cervical vertebrae     | S12    | 1,750           |
| Osteoporosis                                     | 733   | 195         | Injury of nerves at cervical level | S14    | 717             |
| Spinal cord injury without bony injury           | 952   | 70          | Fracture of thoracic vertebrae     | S22    | 842             |
| Fracture of vertebrae with spinal cord injury    | 806   | 61          | Fracture of lumbar spine/pelvis    | S32    | 1,118           |
