# Supplementary material for: Risk Analysis Index and Its Recalibrated Version Predict Postoperative Outcomes Better Than 5-Factor Modified Frailty Index in Traumatic Spinal Injury
Source: PubMed Central journal article supplement — Neurospine. 2022 Dec 31;19(4):1039–48. doi: 10.14245/ns.2244326.163 (PMC9816576; doi:10.14245/ns.2244326.163), 2022-12-31
Supplement: ns-2244326-163-suppl3.pdf [file ns-2244326-163-suppl3.pdf]

**Supplementary Table 3.** RAI-A and RAI-Rev scoring adapted from Hall and colleagues, 2017 and Arya and colleagues, 2020 respectively

| RAI variable                                                                                 | NSQIP variable       | RAI-A scoring                                                                                        | RAI-A Rev scoring                                                                                    |
|----------------------------------------------------------------------------------------------|----------------------|------------------------------------------------------------------------------------------------------|------------------------------------------------------------------------------------------------------|
| Sex                                                                                          | SEX                  | +5 if male                                                                                           | +3 if male                                                                                           |
| Age                                                                                          | AGE                  | + score with cancer<br>(Supplementary Table 4)                                                       | + score with cancer<br>(Supplementary Table 5)                                                       |
| Cancer diagnosis (excluding skin cancer, except melanoma)                                    | DISCANCER            | +1                                                                                                   | Variable only relevant through age                                                                   |
| Weight loss (unintentional weight loss > 4.5 kg over 3 months)                               | WTLOSS               | +5                                                                                                   | +4                                                                                                   |
| Renal failure (or dialysis)                                                                  | DIALYSIS or RENAFAIL | +6 if either yes                                                                                     | +8                                                                                                   |
| Congestive heart failure                                                                     | HXCHF                | +4                                                                                                   | +5                                                                                                   |
| Poor appetite                                                                                | WTLOSS               | +4                                                                                                   | +4                                                                                                   |
| Shortness of breath at rest                                                                  | DYSPNEA              | +8                                                                                                   | +3                                                                                                   |
| Residence other than independent living (transferred from nonhome or intermediate care unit) | TRANST               | +8                                                                                                   | +1                                                                                                   |
| Cognitive deterioration (over past 3 months)                                                 | N/A                  |                                                                                                      |                                                                                                      |
| Activities of daily living                                                                   | FNSTATUS2            | Without cognitive decline<br>+16 = totally dependent<br>+8 = partially dependent<br>+0 = independent | Without cognitive decline<br>+14 = totally dependent<br>+7 = partially dependent<br>+0 = independent |

RAI-A, Risk Analysis Index-administrative; RAI-Rev, Risk Analysis Index recalibrated version; NSQIP, National Surgical Quality Improvement Program; N/A, not applicable.
