# Supplementary material for: Risk Analysis Index and Its Recalibrated Version Predict Postoperative Outcomes Better Than 5-Factor Modified Frailty Index in Traumatic Spinal Injury
Source: PubMed Central journal article supplement — Neurospine. 2022 Dec 31;19(4):1039–48. doi: 10.14245/ns.2244326.163 (PMC9816576; doi:10.14245/ns.2244326.163), 2022-12-31
Supplement: ns-2244326-163-suppl4.pdf [file ns-2244326-163-suppl4.pdf]

**Supplementary Table 4.** Age and cancer diagnosis table scoring adapted from Hall and colleagues, 2017 for RAI-A scoring

| Age (yr) | Score with cancer | Score without cancer |
|----------|-------------------|----------------------|
| ≤ 69     | 20                | 2                    |
| 70–74    | 19                | 3                    |
| 75–79    | 18                | 4                    |
| 80–84    | 17                | 5                    |
| 85–89    | 16                | 6                    |
