# Supplementary material for: Risk Analysis Index and Its Recalibrated Version Predict Postoperative Outcomes Better Than 5-Factor Modified Frailty Index in Traumatic Spinal Injury
Source: PubMed Central journal article supplement — Neurospine. 2022 Dec 31;19(4):1039–48. doi: 10.14245/ns.2244326.163 (PMC9816576; doi:10.14245/ns.2244326.163), 2022-12-31
Supplement: ns-2244326-163-suppl5.pdf [file ns-2244326-163-suppl5.pdf]

**Supplementary Table 5.** Age and cancer diagnosis table of scoring, adapted from Arya and colleagues, 2020, for RAI-Rev

| Age (yr) | Score with cancer | Score without cancer |
|----------|-------------------|----------------------|
| ≤ 19     | 28                | 0                    |
| 20–24    | 29                | 1                    |
| 25–29    | 29                | 4                    |
| 30–34    | 30                | 6                    |
| 35–39    | 30                | 8                    |
| 40–44    | 31                | 10                   |
| 45–49    | 31                | 12                   |
| 50–54    | 32                | 14                   |
| 55–59    | 32                | 16                   |
| 60–64    | 33                | 18                   |
| 65–69    | 34                | 20                   |
| 70–74    | 34                | 22                   |
| 75–79    | 35                | 24                   |
| 80–84    | 35                | 26                   |
| 85–89    | 36                | 28                   |
