# Supplementary material for: Risk Analysis Index and Its Recalibrated Version Predict Postoperative Outcomes Better Than 5-Factor Modified Frailty Index in Traumatic Spinal Injury
Source: PubMed Central journal article supplement — Neurospine. 2022 Dec 31;19(4):1039–48. doi: 10.14245/ns.2244326.163 (PMC9816576; doi:10.14245/ns.2244326.163), 2022-12-31
Supplement: ns-2244326-163-suppl6.pdf [file ns-2244326-163-suppl6.pdf]

**Supplementary Table 6.** RAI-A and RAI-Rev scores stratified into frailty group status

| Frailty description | RAI-A score range | RAI-Rev score range |
|---------------------|-------------------|---------------------|
| Nonfrail            | ≤ 10              | ≤ 10                |
| Prefrail            | 11–20             | 11–20               |
| Frail               | 21–30             | 21–30               |
| Severely frail      | ≥ 31              | ≥ 31                |

RAI-A, Risk Analysis Index-administrative; RAI-Rev, Risk Analysis Index recalibrated version.
