# Supplementary material for: Risk Analysis Index and Its Recalibrated Version Predict Postoperative Outcomes Better Than 5-Factor Modified Frailty Index in Traumatic Spinal Injury
Source: PubMed Central journal article supplement — Neurospine. 2022 Dec 31;19(4):1039–48. doi: 10.14245/ns.2244326.163 (PMC9816576; doi:10.14245/ns.2244326.163), 2022-12-31
Supplement: ns-2244326-163-suppl7.pdf [file ns-2244326-163-suppl7.pdf]

**Supplementary Table 7.** NSQIP clinical variables matched to mFI-5

| mFI-5                                         | Maximum score = 5 |
|-----------------------------------------------|-------------------|
| Nonindependent functional status*             | 1                 |
| Diabetes mellitus with oral agents or insulin | 1                 |
| COPD                                          | 1                 |
| Hypertension requiring medication             | 1                 |
| Congestive heart failure                      | 1                 |

The mFI-5 calculated using the 5 NSQIP variables resulted in an index ranging from 0 (least frail) to 5 (most frail), with a score of 1 as “prefrail”, 2 as “frail”, and 3 or more as “severely frail” as categorical variables.

NSQIP, National Surgical Quality Improvement Program; mFI-5, 5-factor modified frailty index; COPD, chronic obstructive pulmonary disease.

\*Includes both partial and complete dependence.
